# Supplementary material for: Exfoliated MoS 2 nanosheets immobilized in porous microbeads as recoverable photocatalysts
Source: Royal Society of Chemistry journal article supplement (doi:10.1039/d4nr03492a), 2024-11-14
Supplement: d4nr03492a1.pdf [file d4nr03492a1.pdf]

Supplementary Information

## **Exfoliated MoS<sub>2</sub> nanosheets immobilized in porous microbeads as recoverable photocatalysts**

Daehwan Park<sup>a,b,c</sup>, Jin Woong Kim<sup>b</sup>, Chinedum O. Osuji<sup>a,\*</sup>

<sup>a</sup> Department of Chemical and Biomolecular Engineering, University of Pennsylvania, Philadelphia, Pennsylvania 19104, United States

<sup>b</sup> School of Chemical Engineering, Sungkyunkwan University, Suwon 16419, Republic of Korea

<sup>c</sup> Department of Chemistry & Cosmetics, Jeju National University, Jeju 63234, Republic of Korea

**\*Corresponding Author**

E-mail: [cosuji@seas.upenn.edu](mailto:cosuji@seas.upenn.edu)

## Supporting Figures

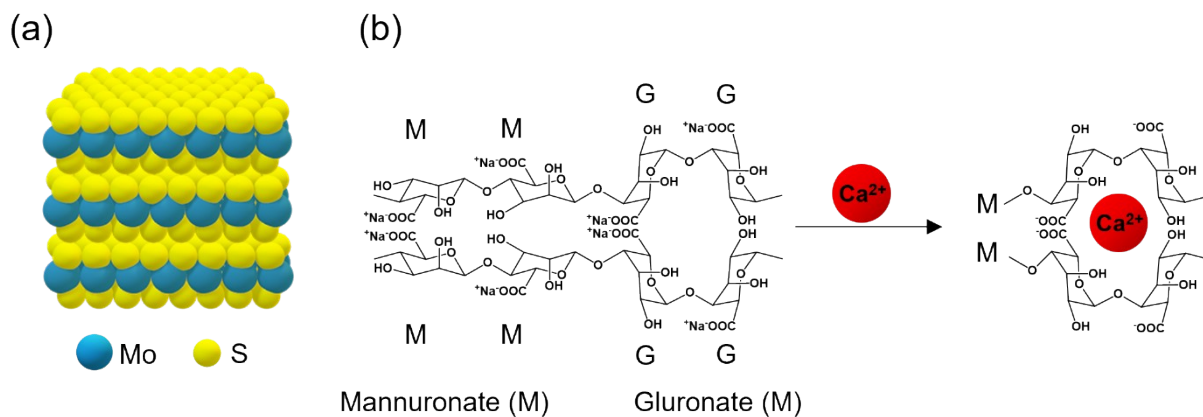

**Fig S1.** (a) Schematic illustration of layered structure of MoS<sub>2</sub>. (b) Chemical structures of sodium alginate and Ca<sup>2+</sup> ion-crosslinked alginate.

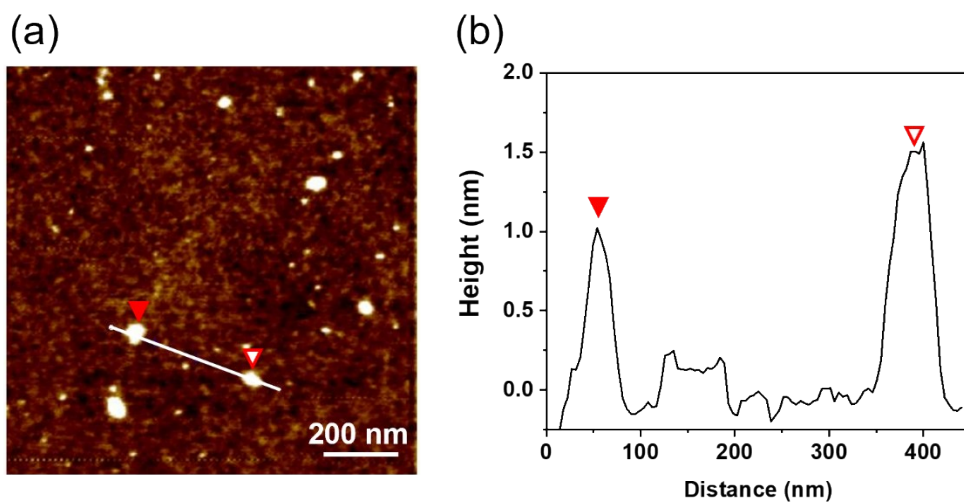

**Fig S2.** (a) AFM image and (b) height profile of chemically exfoliated MoS<sub>2</sub> nanosheets.

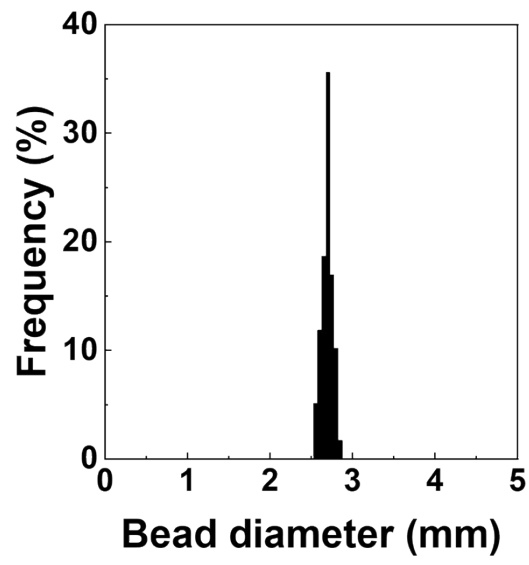

**Fig S3.** Size distribution of MPBs.

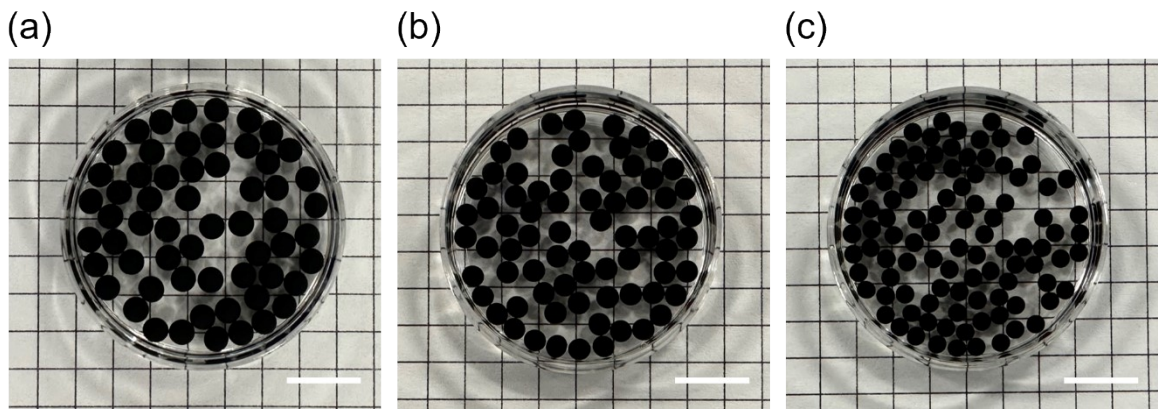

**Fig S4.** Photographs of MPBs depending on syringe diameter: (a) 18 G, (b) 21 G, and (c) 25G (Scale bar = 10 mm).

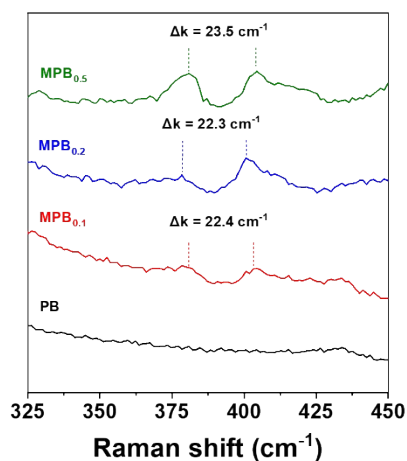

**Fig S5.** Raman spectra of MPB as a function of immobilized MoS<sub>2</sub> concentration.

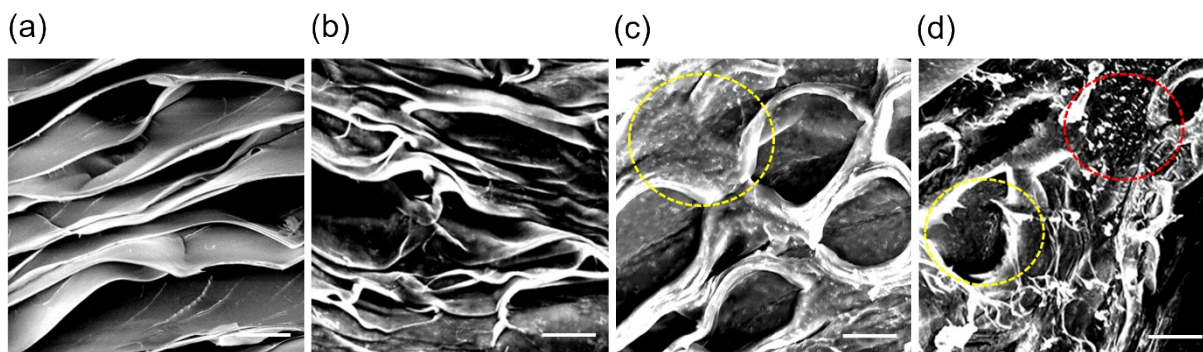

**Fig S6.** Cross-section SEM images of MPB as a function of immobilized MoS<sub>2</sub> concentration: (a) PB (no MoS<sub>2</sub>), (b) MPB<sub>0.1</sub>, (c) MPB<sub>0.2</sub> and (d) MPB<sub>0.5</sub>. (Scale bar = 20 μm). The yellow area represents well-immobilized MoS<sub>2</sub> nanosheets, and the red area represents aggregated MoS<sub>2</sub> nanosheets.

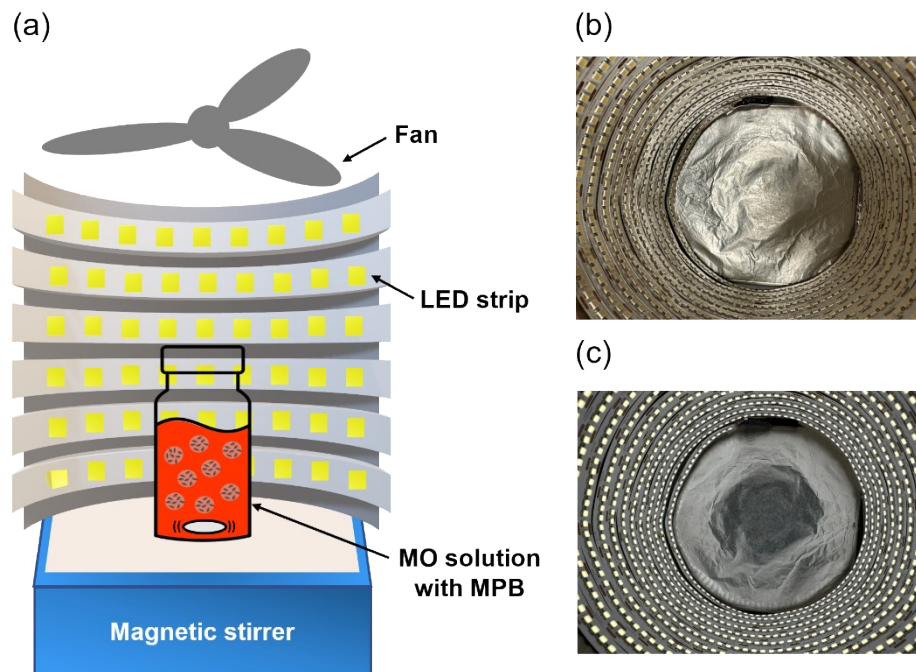

**Fig S7.** Experimental setup for photocatalytic performance test. (a) Schematic illustration of cylindrical photoreactor, real photographs of top view: (b) light off, (c) light on.

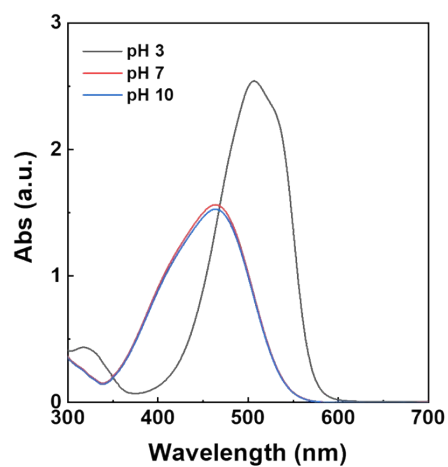

**Fig S8.** UV-Vis spectra of MO solution at different pH conditions.

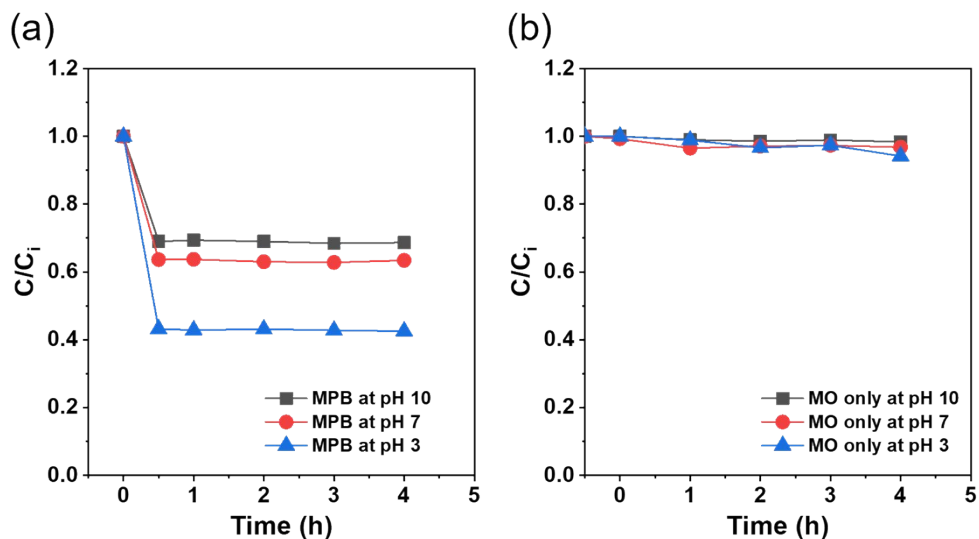

**Fig S9.** (a) MO adsorption of MPB in the dark under various pH conditions. (b) MO photolysis under visible light.  $C_i$  is the initial concentration of MO and  $C$  is the concentration of MO at reaction time  $t$ .

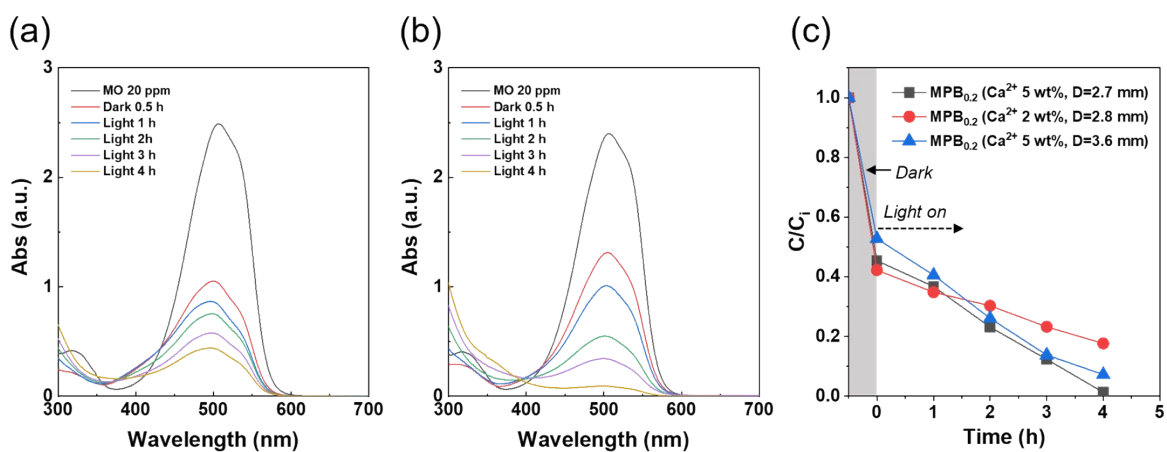

**Fig S10.** UV-vis spectra of MO during photodegradation at pH 3 with (a) MPB<sub>0.2</sub> crosslinked by less Ca<sup>2+</sup> ions (2 wt%), and (b) large size of MPB<sub>0.2</sub> (Diameter: 3.6 mm), respectively. (c) Plots of  $C/C_i$  versus time for the photodegradation of MO using different catalysts.  $C_i$  is the initial concentration of MO and  $C$  is the concentration of MO at reaction time  $t$ .

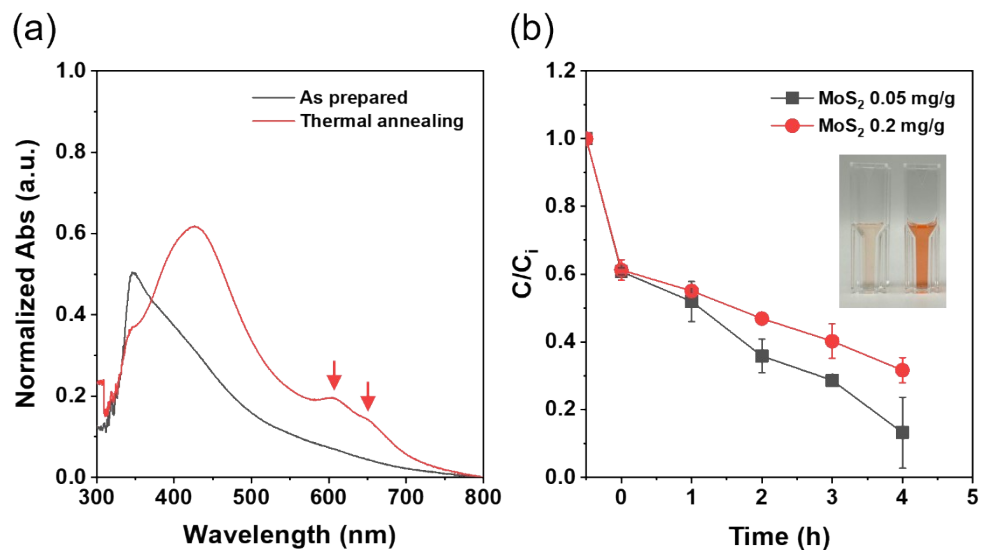

**Fig S11.** (a) UV-Vis spectra of MoS<sub>2</sub> dispersion before and after thermal annealing. (b) Plots of  $C/C_i$  versus time for the photodegradation of MO using thermal annealed MoS<sub>2</sub>-immobilized porous beads catalysts.  $C_i$  is the initial concentration of MO and  $C$  is the concentration of MO at reaction time  $t$ . The inset of (b) is the photograph of MO solution after the photodegradation reaction (left: 0.05 mg/g of MoS<sub>2</sub>, right: 0.2 mg/g of MoS<sub>2</sub>).

**Table S1.** Comparison with MoS<sub>2</sub>-based photocatalyst for photodegradation of dye.

| Catalyst                                                     | Synthetic methods        | Mass of catalyst (mg) | Conc. of dye  | Degradation (%) | Time (min) | Light source            | Reuse | Ref.       |
|--------------------------------------------------------------|--------------------------|-----------------------|---------------|-----------------|------------|-------------------------|-------|------------|
| MoS <sub>2</sub> /Co <sub>3</sub> O <sub>4</sub> nanohybrids | Hydrothermal             | 10                    | 20 mg/L of MO | 95.6            | 170        | 350 W Xe lamp           | O     | 43         |
| Layered MoS <sub>2</sub>                                     | Hydrothermal             | 50                    | 0.5 mM of MB  | 97.5            | 120        | 150 W Excimer lamp      | X     | 44         |
| MoS <sub>2</sub> /Fe <sub>3</sub> O <sub>4</sub>             | Hydrothermal             | 50                    | 10 mg/L of MO | 79.5            | 100        | 300 W Xe lamp           | O     | 45         |
| Leaf-MoS <sub>2</sub> nanosheets                             | Hydrothermal             | 100                   | 50 mg/L of MO | >99             | 70         | 300 W Incandescent lamp | O     | 46         |
| TiO <sub>2</sub> /MoS <sub>2</sub> @zelolite                 | Ultrasonic, hydrothermal | 250                   | 20 mg/L of MO | 95              | 60         | Xe long-arc lamp        | X     | 47         |
| MoS <sub>2</sub> nanoflowers                                 | Hydrothermal             | 20                    | 0.1 mM of MB  | >99             | 20         | Natural day sun light   | X     | 48         |
| MoS <sub>2</sub> nanosheets                                  | Hydrothermal             | 30                    | 20 mg/L of MB | 90              | 330        | 25 W LED                | O     | 49         |
| 2H-MoS <sub>2</sub> nanosheets                               | Exfoliation              | 0.08                  | 5 mg/L of MB  | 85              | 720        | 22 W LED                | X     | 50         |
| 1T@2H MoS <sub>2</sub>                                       | Exfoliation              | 10                    | 20 mg/L of MB | 72.7            | 60         | Xe light                | X     | 51         |
| MPB                                                          | Exfoliation              | 1                     | 20 mg/L of MO | >99             | 240        | 120 W LED               | O     | This study |
